# Supplementary material
Source: Springer Nature journal article supplement (https://www.springermedizin.de/resource/supplementary/12985_2012_2052_MOESM1_ESM.pdf/9606648)

**A**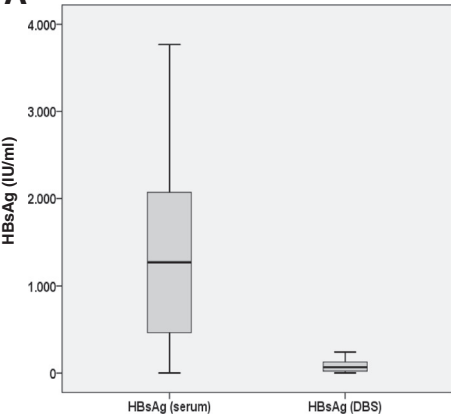**B**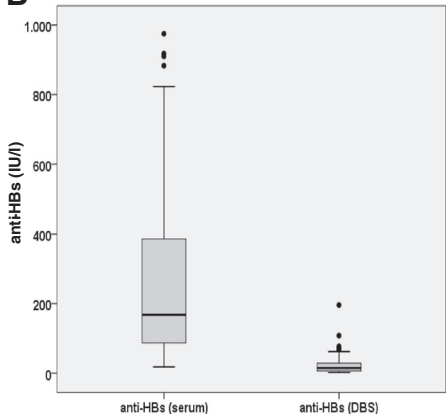

Supplement: MOESM1 [file 9606648]
